# Supplementary material for: Sulfur ion-exchange strategy to obtain Bi2S3 nanostructures from Bi2O3 for better water splitting performance
Source: Royal Society of Chemistry journal article supplement (doi:10.1039/d4dt01083c), 2024-01-01
Supplement: d4dt01083c1.pdf [file d4dt01083c1.pdf]

## Supporting Information

### Sulfur ion-exchange strategy to obtaining Bi<sub>2</sub>S<sub>3</sub> nanostructures from Bi<sub>2</sub>O<sub>3</sub> for better water splitting performance

Hamdan M. Danamah<sup>a</sup>, Tariq M. Al-Hejri<sup>a</sup>, Vijakumar V. Jadhav<sup>b</sup>, Zeenat A. Shaikh<sup>a</sup>, T. A. J. Siddiqui<sup>a</sup>, Shoyebmohamad F. Shaikh<sup>c,\*</sup>, and Rajaram S. Mane<sup>a\*</sup>

<sup>a</sup>School of Physical Sciences, Swami Ramanand Teerth Marathwada University, Nanded, MS, India-431606

<sup>b</sup>Guangdon Provincial Key Laboratory of Materials & Technologies for Energy Conversion, GTIIT, 241 Daxue Road, Shantou, Guangdong, China, 515063

<sup>c</sup>Department of Chemistry, College of Science, King Saud University, P.O. Box 2455, Riyadh, 11451, Saudi Arabia.

**SI:** Chemical reactions showing the synthesis of the Bi<sub>2</sub>O<sub>3</sub> and its conversion to Bi<sub>2</sub>S<sub>3</sub> in the presence of different sulphur ion sources

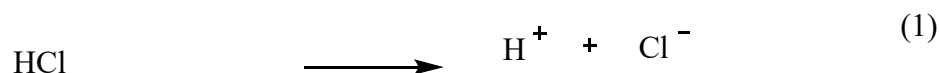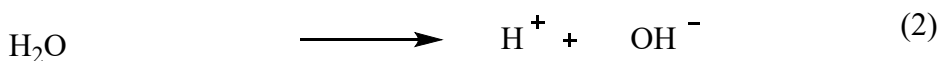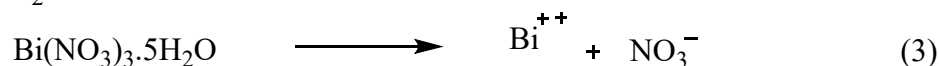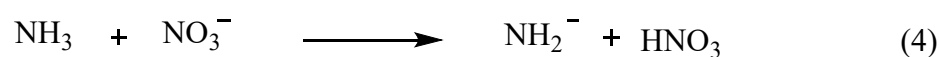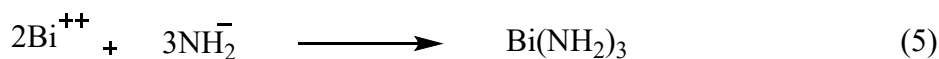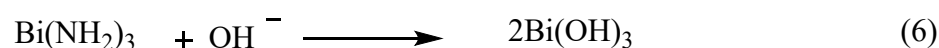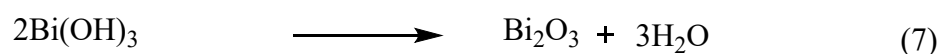

*Formation of Bi<sub>2</sub>S<sub>3</sub> from Bi<sub>2</sub>O<sub>3</sub> in the presence of the sodium sulphate*

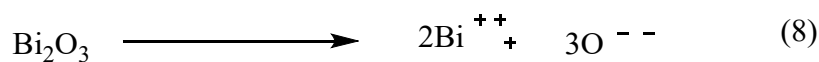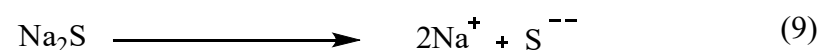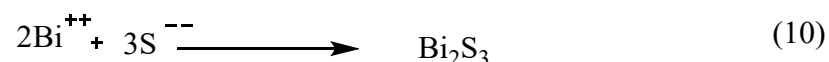

*Formation of Bi<sub>2</sub>S<sub>3</sub> from Bi<sub>2</sub>O<sub>3</sub> in the presence of the thioacetamide (TAA)*

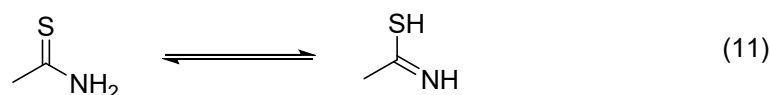

Protonation gives the following intermediate compound

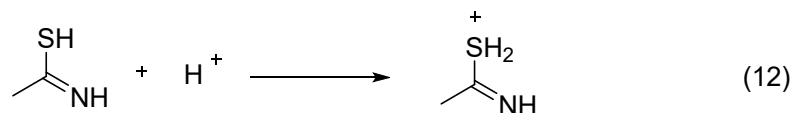

Intermediate 12 dissociates to give H<sub>2</sub>S

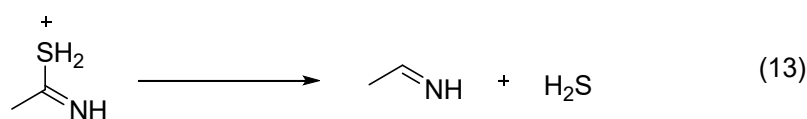

Hydrogen sulphide dissociates to give sulphur ions

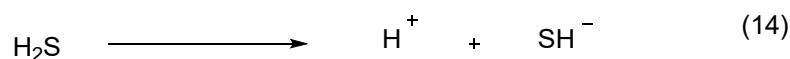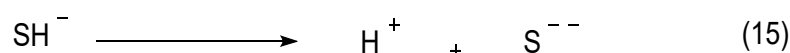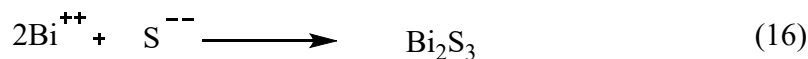

*Formation of Bi<sub>2</sub>S<sub>3</sub> from Bi<sub>2</sub>O<sub>2</sub> in the presence of the thiourea*

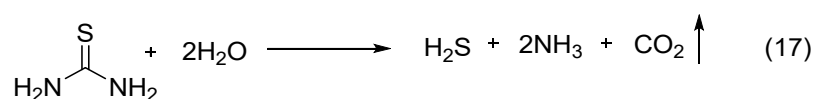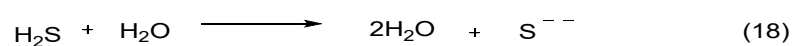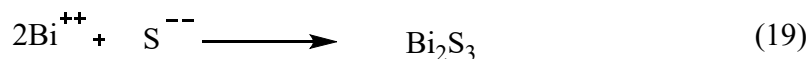

*Formation of Bi<sub>2</sub>S<sub>3</sub> from Bi<sub>2</sub>O<sub>2</sub> in the presence of the sodium thiosulfate (STS)*

The half-cell reaction of reducing agent Na<sub>2</sub>S<sub>2</sub>O<sub>3</sub> is

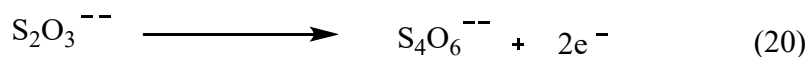

Aqueous medium dissociation is shown as follows

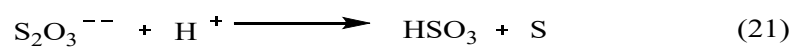

Sulfur from reaction 21 captures electrons released in reaction 20 follows

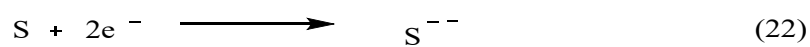

Finally, S ions react with bismuth ions to form bismuth sulphide

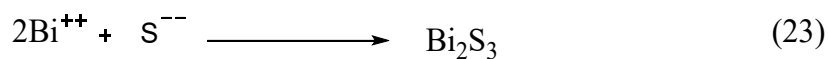

*S1:*

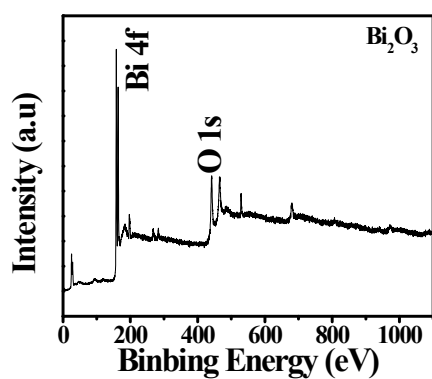

**Figure S1:** XPS surface analysis Bi<sub>2</sub>O<sub>3</sub>

*S2:*

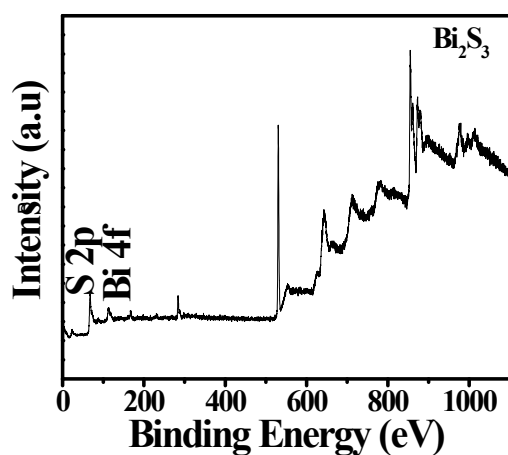

**Figure S2:** XPS spectrum of the Bi<sub>2</sub>S<sub>3</sub> prepared from the thioacetamide.

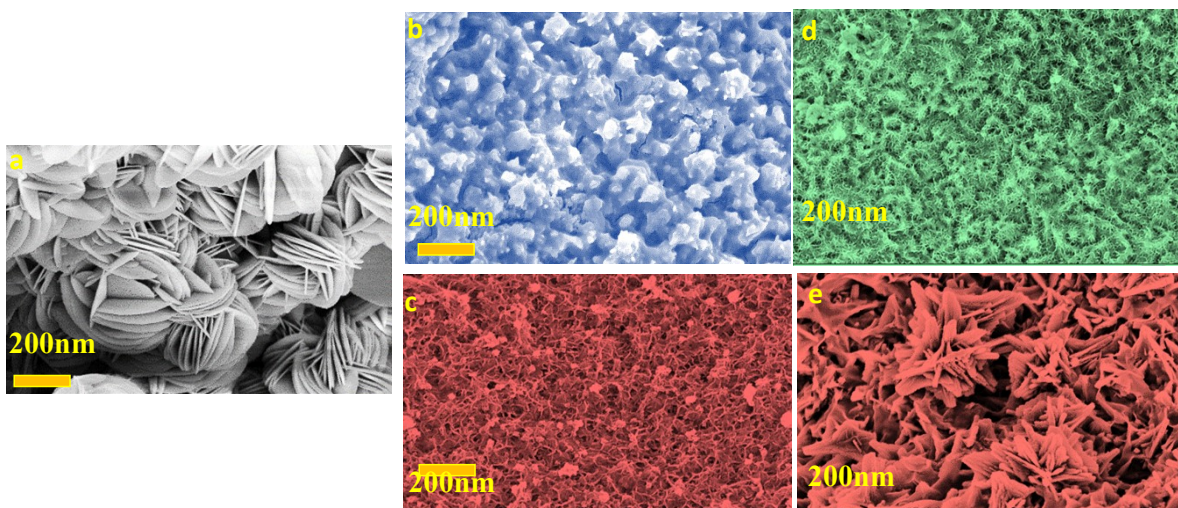

**Figure S3.** FE-SEM images of; (a)  $\text{Bi}_2\text{O}_3$  and its conversion to  $\text{Bi}_3\text{S}_3$  from SS(b), TAA (c), TU (d), and STS (e) sulphur sources at the same magnifications. Also, the bar scales on both sides are the same.

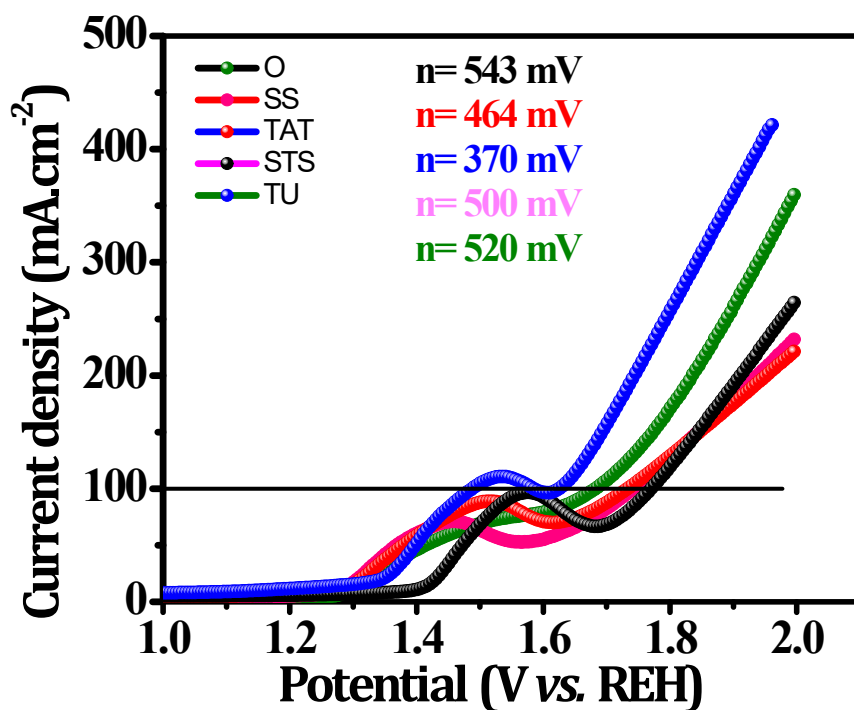

**Fig. S4.** OER performance for all electrodes.

$$\text{TOF} = j \cdot \text{NA} / (F \cdot n \cdot I)$$

where  $j$ ,  $\text{NA}$ ,  $F$ ,  $n$ , and  $I$  represent current density, the Avogadro constant, the Faraday constant, the number of electrons transferred to generate one molecule of the product, and the surface concentration or exact number of active sites catalyzing the reaction ( $\text{m}^{-2}$ ), respectively.

Table S1. Comparison of surface area, pore-diameter, and performance of electrode.

| <b>Electrode</b>              | <b>Morphology</b> | <b>Surface area <math>\text{m}^2 \text{g}^{-1}</math></b> | <b>Pore Diameter</b> |
|-------------------------------|-------------------|-----------------------------------------------------------|----------------------|
| $\text{Bi}_2\text{O}_3$       | Nanoplates        | 7.4                                                       | 2.98                 |
| $\text{Bi}_2\text{S}_3$ -SS   | walnut-like       | 12.79                                                     | 3.49                 |
| $\text{Bi}_2\text{S}_3$ - TAA | Network           | 22.020                                                    | 2.186                |
| $\text{Bi}_2\text{S}_3$ -TU   | Nanowires         | 5.716                                                     | 4.0                  |
| $\text{Bi}_2\text{S}_3$ -STS  | Nanoflowers       | 14.8                                                      | 3.6                  |
